# Supplementary material for: Highly efficient & stable Bi & Sb anodes using lithium borohydride as solid electrolyte in Li-ion batteries
Source: Royal Society of Chemistry journal article supplement (doi:10.1039/c9ra01479a), 2019-01-01
Supplement: c9ra01479a1.pdf [file c9ra01479a1.pdf]

## Highly efficient & stable Bi & Sb anodes using lithium borohydride as solid electrolyte in Li-ion batteries

(Electronic Supplementary Information)

**Pooja Kumari<sup>1,2</sup>, Khushbu Sharma<sup>1,2</sup>, Pratibha Pal<sup>1</sup>, Manoj Kumar<sup>2</sup>, Takayuki Ichikawa<sup>1,#</sup>, Ankur Jain<sup>3,\*</sup>**

<sup>1</sup>Graduate School of Engineering, Hiroshima University, Higashi-Hiroshima 739-8527, Japan

<sup>2</sup>Department of Physics, Malaviya National Institute of Technology, Jaipur, Rajasthan-302017

<sup>3</sup>Natural Science Centre for Basic Research and Development, Hiroshima University, Higashi-Hiroshima 739-8521, Japan

*E-mail: ankur.j.ankur@gmail.com\**, *tichi@hiroshima-u.ac.jp#*

### Experimental Details

Two coin cells constituting of Bi-LiBH<sub>4</sub>-AB|LiBH<sub>4</sub>|Li & Sb-LiBH<sub>4</sub>-AB|LiBH<sub>4</sub>|Li have been fabricated to perform the electrochemical tests. The commercially available bulk Bi (Alfa aesar 99.999%), and Sb (Rare Metallic Co. Ltd. 99.9%) were used as received, whereas as-purchased LiBH<sub>4</sub> (Sigma Aldrich, 95%) and acetylene black (AB) were dried under vacuum at 200°C for 24 hr before using these for the preparation of negative electrode material. LiBH<sub>4</sub> and AB were used to enhance the ionic and electrical conductivity of the anode materials. The negative electrodes were prepared by ball milling of Bi/Sb, LiBH<sub>4</sub> and conductive carbon (acetylene black AB) in 40:30:30 weight ratio for 2hrs with one hr milling and 30 min rest pattern. The ball milling was carried out in a hardened stainless steel ball of 7 mm in diameter. The milling of 200 mg anode material was performed with 10 SS balls at 370 rpm using Fritsch P7. To measure the electrochemical performance of Bi/Sb anode material, a coin cell was fabricated using a three-layer pellet. Li-foil on SS plate was used as the first layer, working as cathode. The second layer was prepared by spreading the solid electrolyte LiBH<sub>4</sub> (80 mg) on the Li-foil and applying a pressure of 10 MPa for 5 min. Then the prepared anode composite powder (10 mg) was spread on the two-layered pellet and pressed with 40 MPa pressure for 5 min. Then, this 3-layer pellet was placed in a coin cell and sealed with Perfluoroalkoxy (PFA) gasket. A charge-discharge analyzer (HJ1001SD8, Hokuto Denko Co.) was used to observe the electrochemical performance

of Bi/Sb vs. *Li* – metal, by Galvanostatic charge-discharge measurements at an optimized rate of 0.1C. To obtain the fast  $\text{Li}^+$  conduction from  $\text{LiBH}_4$ , all electrochemical measurements in this study were conducted at  $120^\circ\text{C}$  by using a silicon oil bath as the heating source. The potential window for charging-discharging cycles was optimized by cyclic voltammetry (CV), performed on a Bio logic SAS (SP-150) system. The galvanostatic charging/discharging profile was recorded using Hokuto Denko Charge/Discharge Unit (HJ-SD8). The electrochemical reaction mechanism was identified using powder X-ray diffraction (XRD) performed at different stages of electrochemical charging/discharging.

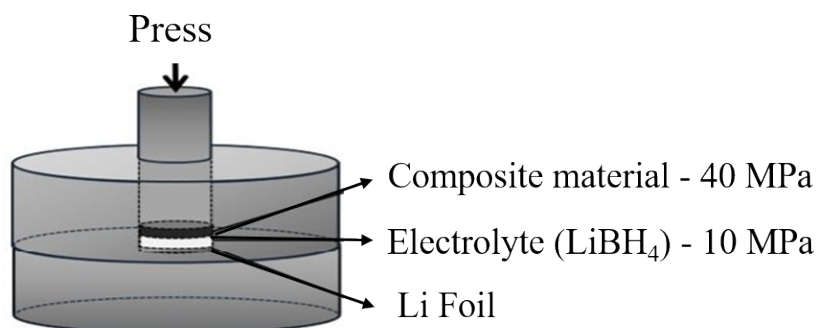

**Schematic diagram of the coin cell fabrication**

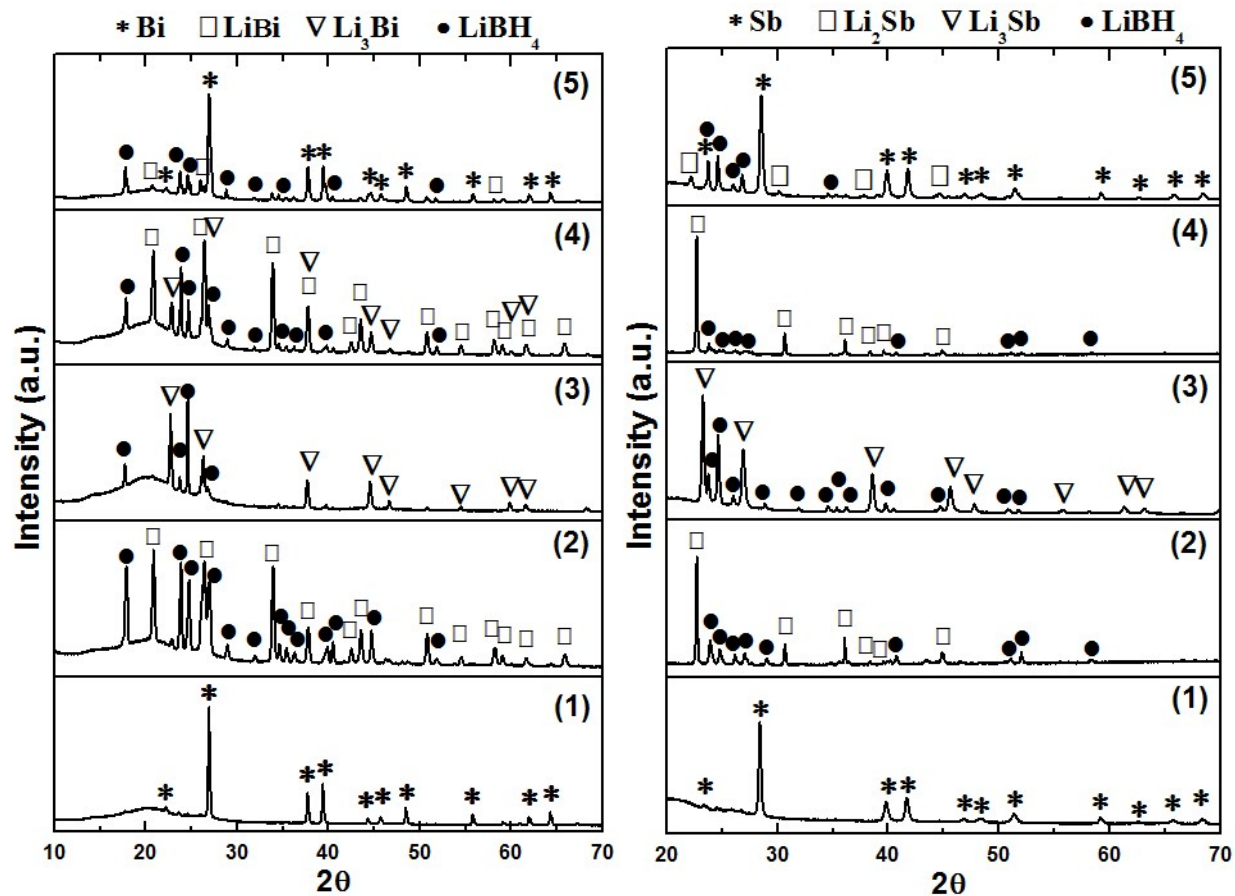

Figure S1 and S2: *Ex situ* XRD patterns of Bi/Sb-LiBH<sub>4</sub>-AB composite electrodes at different stages (indicated in fig. 2a and 2b) of the first electrochemical discharge – charge process.

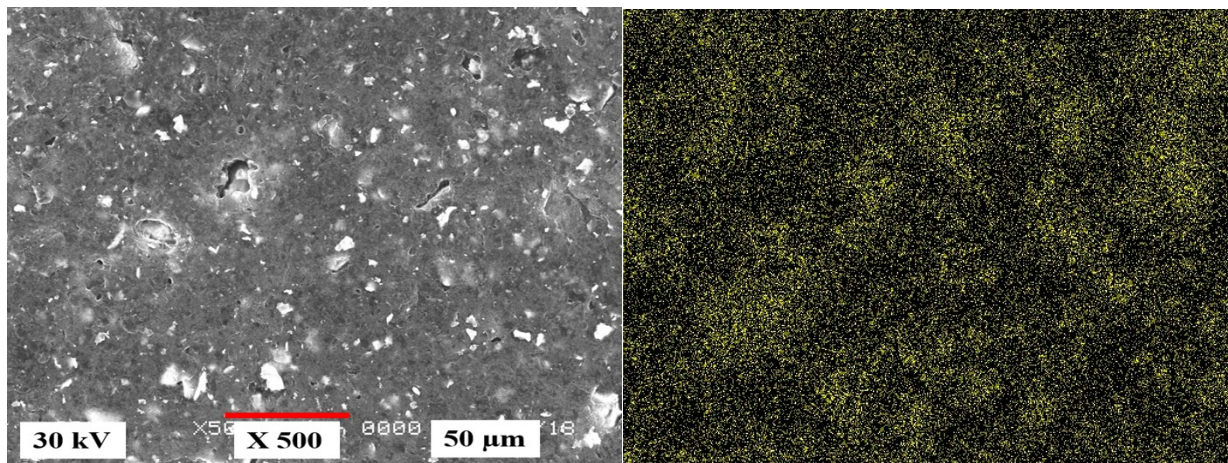

**(a)**

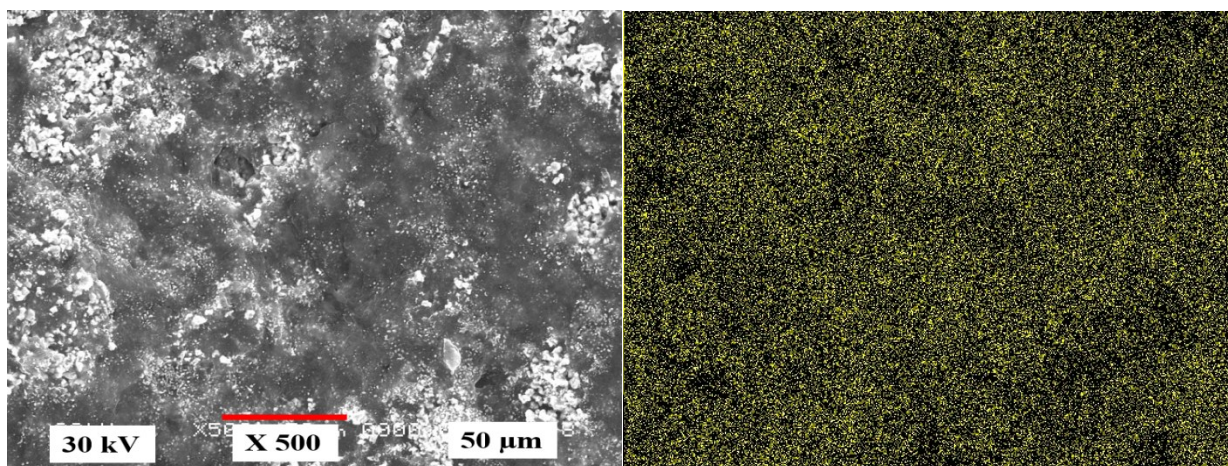

**(b)**

**Figure S<sub>3</sub>: SEM images and corresponding elemental (Bi) mapping of Bi-LiBH<sub>4</sub>-AB composite electrode (a) before and (b) after cycling.**



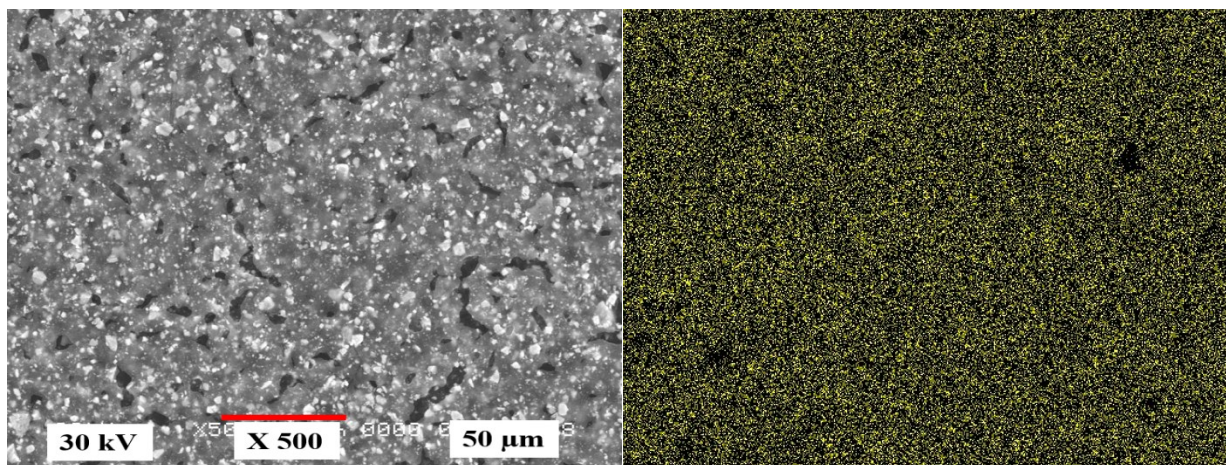

**(a)**

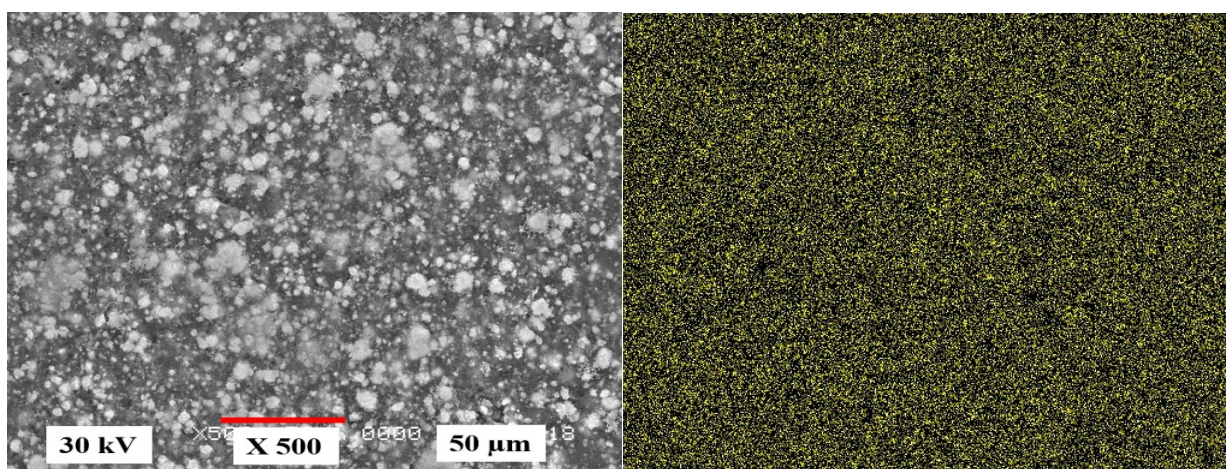

**(b)**

**Figure S<sub>4</sub>: SEM images and corresponding elemental (Sb) mapping of Sb-LiBH<sub>4</sub>-AB composite electrode (a) before and (b) after cycling.**
